# Supplementary material
Source: MDPI journal article supplement (https://www.mdpi.com/2072-4292/13/12/2379)
Supplement: s1 [file s1]

# Remote sensing based yield estimation of rice (*Oryza sativa* L.) using gradient boosted regression in India

Ponraj Arumugam, Abel Chemura, Bernhard Schauburger and Christoph Gornott

**Table S1:** Parameters tested in the hyperparameter tuning to find the best model from GBR decision trees for all the states.

| States           | Observations | n_estimators                  | learning_rate                     | max_depth               | min_sample_split        | min_sample_leaf              |
|------------------|--------------|-------------------------------|-----------------------------------|-------------------------|-------------------------|------------------------------|
| Uttar Pradesh    | 26775        | 500–5000<br>(interval of 500) | 0.01–0.001<br>(interval of 0.001) | 3–15<br>(interval of 2) | 2–10<br>(interval of 2) | 1 and<br>2–4 (interval of 2) |
| Punjab           | 11942        |                               |                                   |                         |                         |                              |
| Chhattisgarh     | 11035        |                               |                                   |                         |                         |                              |
| West Bengal      | 10674        |                               |                                   |                         |                         |                              |
| Andhra Pradesh   | 9847         |                               |                                   |                         |                         |                              |
| Odisha           | 6678         | 500–3000<br>(interval of 500) | 0.01–0.001<br>(interval of 0.001) | 3–15<br>(interval of 2) | 2–10<br>(interval of 2) | 1 and<br>2–4 (interval of 2) |
| Madhya Pradesh   | 6003         |                               |                                   |                         |                         |                              |
| Telangana        | 5291         |                               |                                   |                         |                         |                              |
| Karnataka        | 5155         |                               |                                   |                         |                         |                              |
| Maharashtra      | 4937         |                               |                                   |                         |                         |                              |
| Haryana          | 3773         | 100–1900<br>(interval of 300) | 0.1–0.01<br>(interval of 0.01)    | 3–13<br>(interval of 2) | 2–10<br>(interval of 2) | 1 and<br>2–4 (interval of 2) |
| Bihar            | 2495         |                               |                                   |                         |                         |                              |
| Gujarat          | 2417         |                               |                                   |                         |                         |                              |
| Jharkhand        | 1264         |                               |                                   |                         |                         |                              |
| Uttarakhand      | 922          |                               |                                   |                         |                         |                              |
| Rajasthan        | 651          | 100–1000<br>(interval of 100) | 0.1–0.01<br>(interval of 0.01)    | 3–13<br>(interval of 2) | 2–10<br>(interval of 2) | 1 and<br>2–4 (interval of 2) |
| Jammu & Kashmir  | 413          |                               |                                   |                         |                         |                              |
| Himachal Pradesh | 237          |                               |                                   |                         |                         |                              |

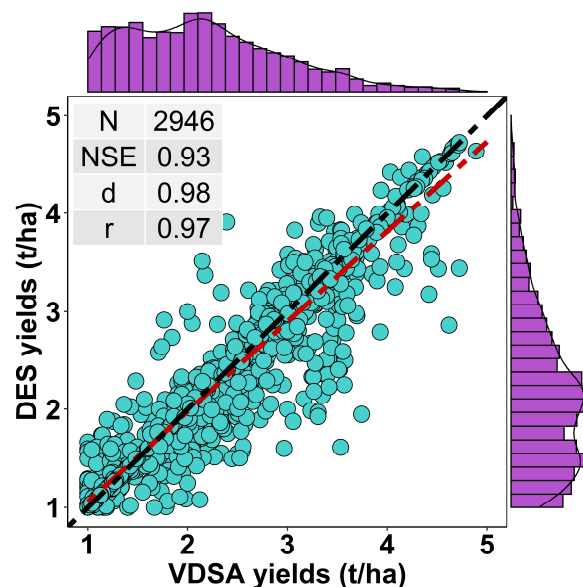

**Figure S1.** Comparison between two different observed yields, VDSA and DES.

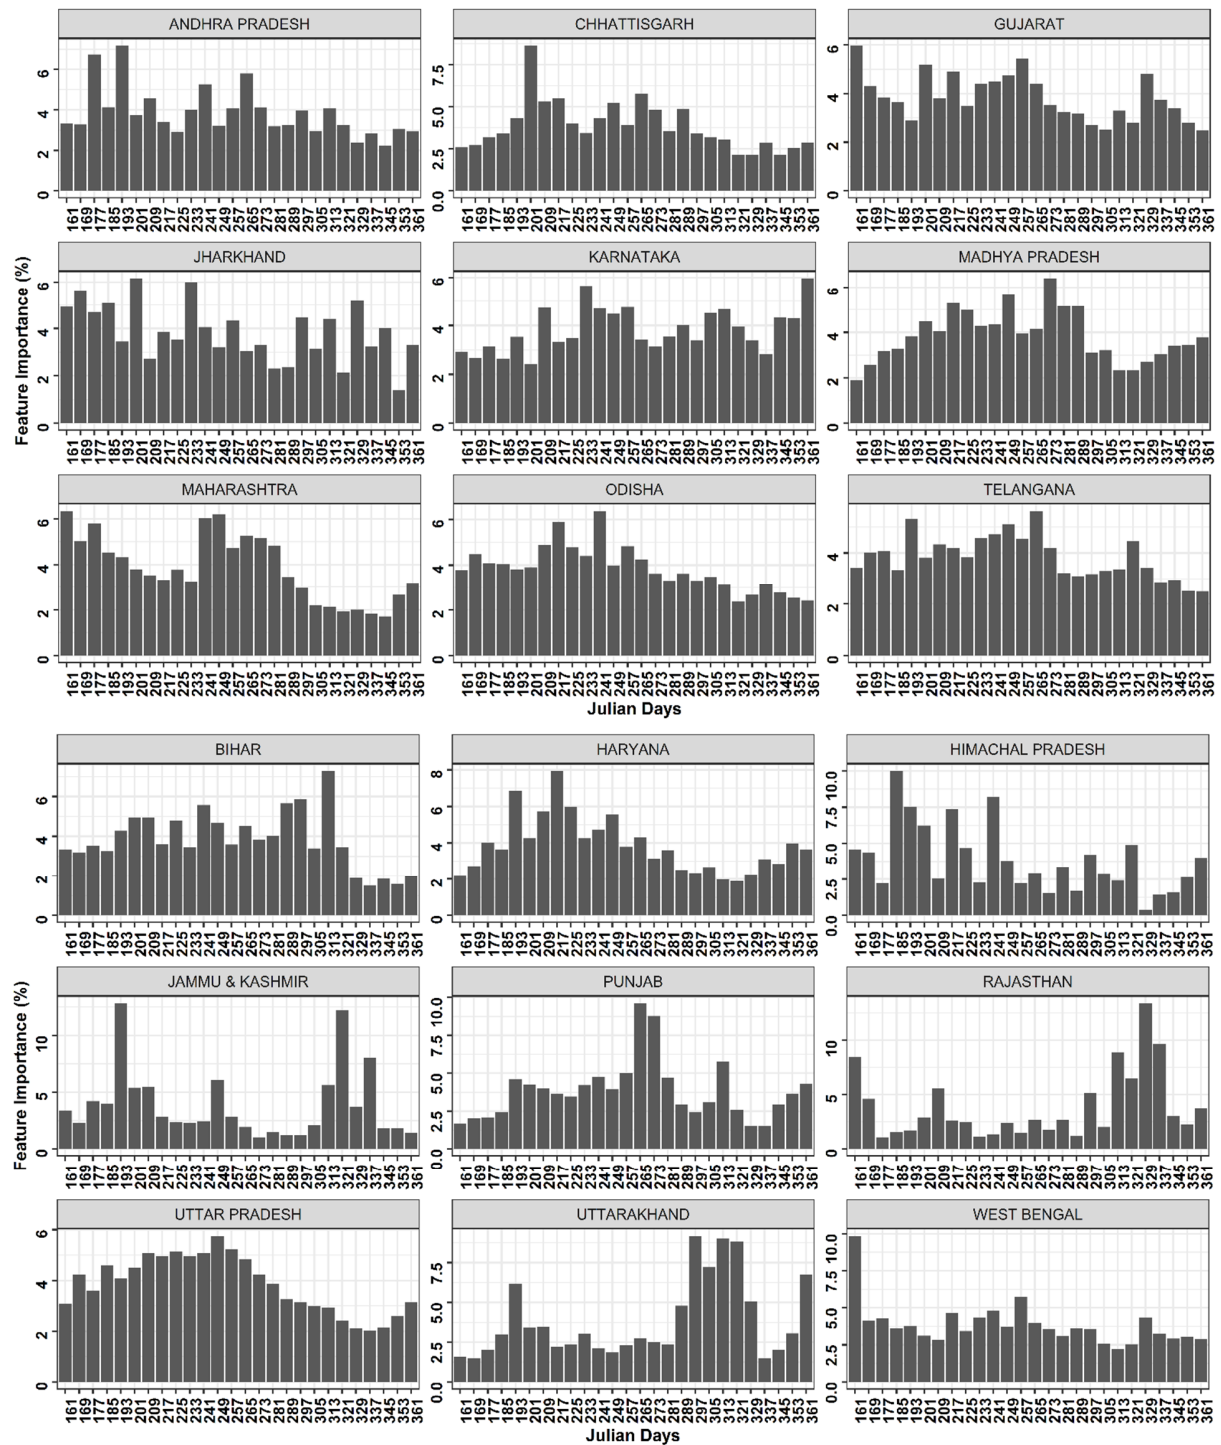

**Figure S2.** State-wise relative importance (%) of input parameters (time-series LAI values) in GBR.

**Table S2.** The state-wise aggregated yield (2003 to 2015) of observed and simulated.

| State            | OBS  | SIM  |
|------------------|------|------|
| Andhra Pradesh   | 2.86 | 2.85 |
| Bihar            | 1.23 | 1.30 |
| Chhattisgarh     | 1.49 | 1.50 |
| Gujarat          | 1.77 | 1.96 |
| Haryana          | 2.87 | 2.89 |
| Himachal Pradesh | 1.58 | 1.71 |
| Jammu & Kashmir  | 1.57 | 1.79 |
| Jharkhand        | 1.85 | 1.83 |
| Karnataka        | 2.55 | 2.61 |
| Madhya Pradesh   | 1.16 | 1.22 |
| Maharashtra      | 1.38 | 1.57 |
| Odisha           | 1.50 | 1.52 |
| Punjab           | 3.81 | 3.86 |
| Rajasthan        | 1.87 | 1.92 |
| Telangana        | 2.88 | 2.94 |
| Uttar Pradesh    | 2.08 | 2.12 |
| Uttarakhand      | 1.69 | 1.96 |
| West Bengal      | 2.49 | 2.57 |

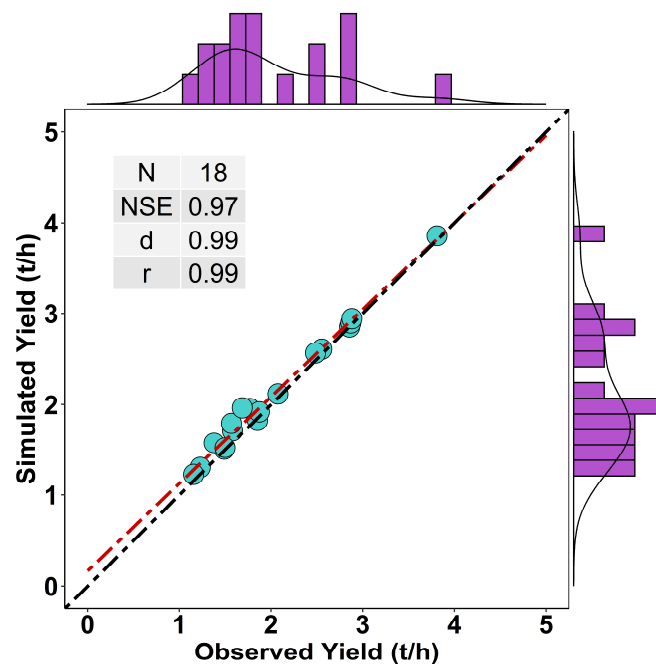

**Figure S3:** The comparison between state aggregated over the model development years (2003–2015) of observed and simulated yields. The points in the plots are representing states. The red and black lines are representing the trend line and 1:1 line, respectively. The values for the indicators N, NSE, d, and r are representing the number of observations, Nash–Sutcliffe model efficiency coefficient, the index of agreement and the Pearson's correlation coefficient, respectively. The histograms on the plot representing the yield distribution in the observed and simulated yield.

**Table S3:** The temporal validation between block-level observed and simulated yields. N, d, and r represent observations, the index of agreement, and the correlation coefficient, respectively.

| Year | 2003 | 2004 | 2005 | 2006 | 2007 | 2008 | 2009 | 2010 | 2011 | 2012 | 2013 | 2014 | 2015 |
|------|------|------|------|------|------|------|------|------|------|------|------|------|------|
| N    | 105  | 103  | 104  | 103  | 98   | 96   | 99   | 98   | 87   | 87   | 81   | 83   | 81   |
| d    | 0.65 | 0.72 | 0.68 | 0.59 | 0.62 | 0.67 | 0.66 | 0.72 | 0.64 | 0.67 | 0.58 | 0.66 | 0.57 |
| r    | 0.7  | 0.81 | 0.64 | 0.52 | 0.7  | 0.76 | 0.71 | 0.74 | 0.65 | 0.65 | 0.67 | 0.79 | 0.56 |

**Table S4:** The parameters used for analyzing the assessment of the goodness index.

| Statistical parameter                                   | Formula                                                                                                                                                                    | Reference |
|---------------------------------------------------------|----------------------------------------------------------------------------------------------------------------------------------------------------------------------------|-----------|
| The index of agreement (d)                              | $1 - \left[ \frac{\sum_{i=1}^n (P_i - O_i)^2}{\sum_{i=1}^n ( P_i - \bar{O}  +  O_i - \bar{O} )^2} \right]$                                                                 | [1]       |
| Nash–Sutcliffe model efficiency coefficient (NSE)       | $1 - \left[ \frac{\sum_{i=1}^n (P_i - O_i)^2}{\sum_{i=1}^n (O_i - \bar{O})^2} \right]$                                                                                     | [2]       |
| Mean Absolute Error (MAE)                               | $\frac{1}{n} \sum_{i=1}^n  P_i - O_i $                                                                                                                                     | [3]       |
| Pearson's correlation coefficient (r)                   | $\frac{\sum_{i=1}^n (O_i - \bar{O})(P_i - \bar{P})}{\sqrt{\frac{1}{n} \sum_{i=1}^n (O_i - \bar{O})^2} \sqrt{\frac{1}{n} \sum_{i=1}^n (P_i - \bar{P})^2}}$                  | [4]       |
| Pearson's correlation coefficient of determination (R2) | $\left( \frac{\sum_{i=1}^n (O_i - \bar{O})(P_i - \bar{P})}{\sqrt{\frac{1}{n} \sum_{i=1}^n (O_i - \bar{O})^2} \sqrt{\frac{1}{n} \sum_{i=1}^n (P_i - \bar{P})^2}} \right)^2$ | [5]       |
| Root Mean Square Error (RMSE)                           | $\sqrt{\frac{1}{n} \sum (P_i - O_i)^2}$                                                                                                                                    | [6]       |
| %Root Mean Square Error (RMSE)                          | $100 * \sum (O_i)^{-1} * \sqrt{\frac{1}{n} \sum (P_i - O_i)^2}$                                                                                                            | [7]       |

Note:  $P_i$  – Time-series simulated yield anomaly;  $O_i$  – Time-series observed yield anomaly;  $n$ – Number of time series;  $\bar{O}$  is the mean of the observed yields

**Equation S1:** Multiple linear regression model

$$Y_i = \beta_0 + \beta_1 X_{i1} + \beta_2 X_{i2} + \beta_k X_{ik} + \beta_i$$

$Y_i$  = response value for  $i^{\text{th}}$  individual

$X_{ij}$  = value of the  $j^{\text{th}}$  independent variable for the  $i^{\text{th}}$  individual

$\beta_0$  = Intercept of regression equation

$\beta_j$  = coefficient of the  $j^{\text{th}}$  independent variable

$\beta_i$  =  $i^{\text{th}}$  random error component

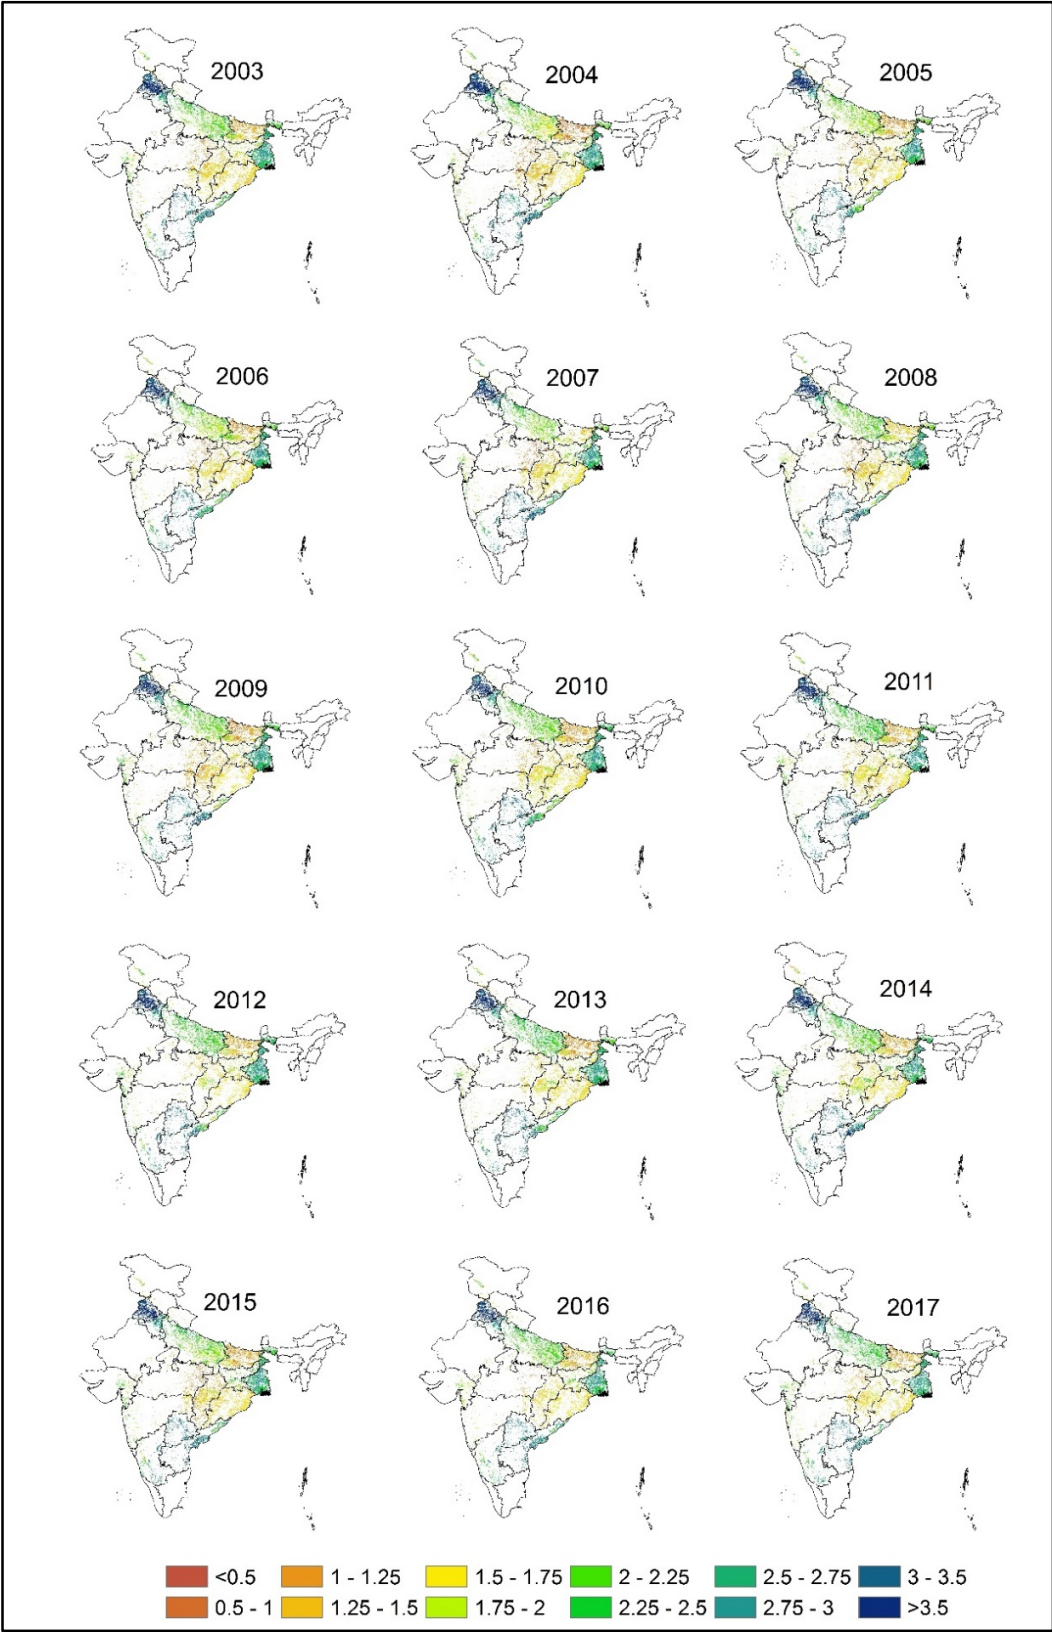

Figure S4: Spatial distribution of simulated yields from the year 2003 to 2017.

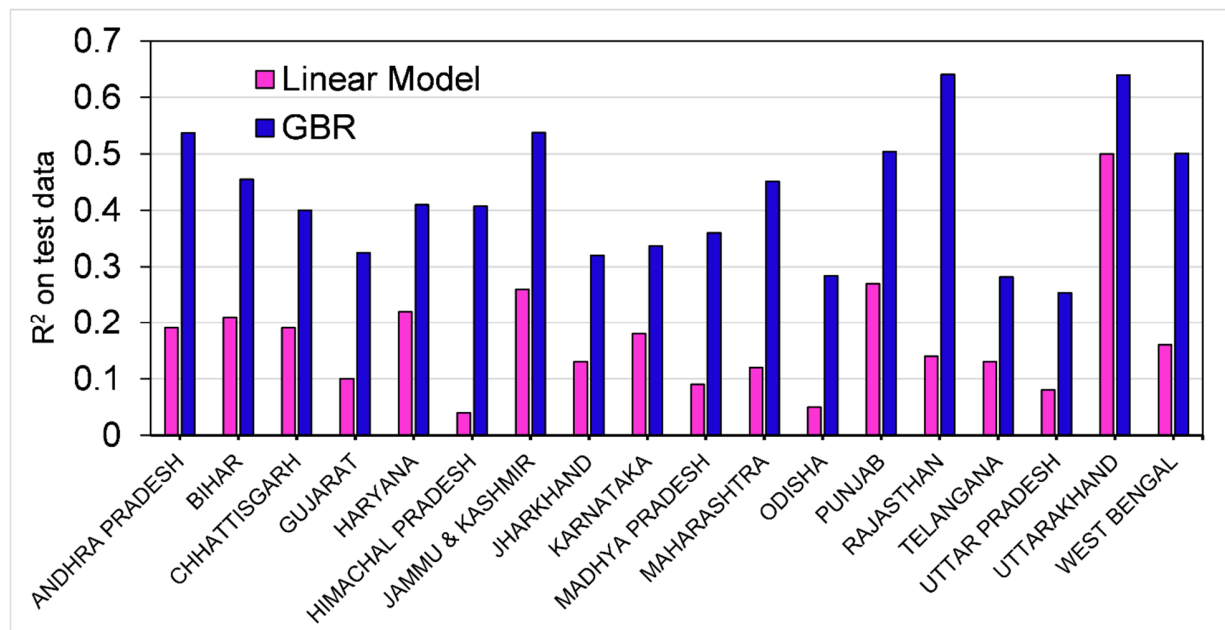

**Figure S5:** Comparison between GBR and Linear model's (trained with 80% of data) accuracy on test data (validated with 20% of data) for each state.

**Table S5:** Comparison between GBR and Linear model's (trained with 80% of data) accuracy on test data (validated with 20% of data) for each state with the difference increased in GBR from linear models.

| States           | Linear Model (R2) | GBR (R2) | % difference |
|------------------|-------------------|----------|--------------|
| Andhra Pradesh   | 0.19              | 0.54     | 182.7        |
| Bihar            | 0.21              | 0.45     | 116.7        |
| Chhattisgarh     | 0.19              | 0.40     | 110.8        |
| Gujarat          | 0.1               | 0.33     | 225.1        |
| Haryana          | 0.22              | 0.41     | 86.4         |
| Himachal Pradesh | 0.04              | 0.41     | 917.9        |
| Jammu & Kashmir  | 0.26              | 0.54     | 106.9        |
| Jharkhand        | 0.13              | 0.32     | 146.2        |
| Karnataka        | 0.18              | 0.34     | 87.2         |
| Madhya Pradesh   | 0.09              | 0.36     | 300.2        |
| Maharashtra      | 0.12              | 0.45     | 276.1        |
| Odisha           | 0.05              | 0.28     | 468.2        |
| Punjab           | 0.27              | 0.50     | 86.5         |
| Rajasthan        | 0.14              | 0.64     | 357.4        |
| Telangana        | 0.13              | 0.28     | 116.9        |
| Uttar Pradesh    | 0.08              | 0.25     | 216.9        |
| Uttarakhand      | 0.5               | 0.64     | 28.0         |
| West Bengal      | 0.16              | 0.50     | 213.0        |

## References:

1. Willmott, C.J. On the Validation of Models. *Phys. Geogr.* **1981**, *2*, 184–194.
2. Yuan, F.; Ren, L.-L.; Yu, Z.-B.; Xu, J. River Flow Routing Model Based on Digital Drainage Network. *J. Hydrodyn. Ser. B* **2005**, *17*, 483–488.
3. Taylor, S.L.; Payton, M.E.; Raun, W.R. Relationship between Mean Yield, Coefficient of Variation, Mean Square Error, and Plot Size in Wheat Field Experiments. *Commun. Soil Sci. Plant Anal.* **1999**, *30*, 1439–1447.
4. Sedgwick, P. Pearson's Correlation Coefficient. *Bmj* **2012**, *345*, e4483.
5. Kvålseth, T.O. Cautionary Note about R 2. *Am. Stat.* **1985**, *39*, 279–285.
6. Balkovič, J.; van der Velde, M.; Schmid, E.; Skalský, R.; Khabarov, N.; Obersteiner, M.; Stürmer, B.; Xiong, W. Pan-European Crop Modelling with EPIC: Implementation, up-Scaling and Regional Crop Yield Validation. *Agric. Syst.* **2013**, *120*, 61–75, doi:10.1016/j.agry.2013.05.008.
7. Smith, M.W.; Then, A.Y.; Wor, C.; Ralph, G.; Pollock, K.H.; Hoenig, J.M. Recommendations for Catch-Curve Analysis. *North Am. J. Fish. Manag.* **2012**, *32*, 956–967, doi:10.1080/02755947.2012.711270.
